1 **Increased neutralization of SARS-CoV-2 Delta variant by nanobody**  
2 **(Nb22) and the structural basis**

3 Xilin Wu<sup>1,2,†</sup>, Yaxing Wang<sup>3,†</sup>, Lin Cheng<sup>4,†</sup>, Linjing Zhu<sup>2,†</sup>, Sen Ma<sup>3</sup>, Bilian Huang<sup>1</sup>,  
4 Shijie Xu<sup>5</sup>, Haixia Shi<sup>5</sup>, Doudou Zhang<sup>5</sup>, Linshuo Liu<sup>5</sup>, Waqas Nawaz<sup>1</sup>, Sheng Ye<sup>3,6\*</sup>,  
5 Zhiwei Wu<sup>7, 8, 9,10\*</sup>

6 1. Center for Public Health Research, Medical School, Nanjing University, Nanjing,  
7 P.R. China.

8 2. Department of Antibody, Abrev Biotechnology Co., Ltd. Nanjing, P.R. China.

9 3. Tianjin Key Laboratory of Function and Application of Biological Macromolecular  
10 Structures, School of Life Sciences, Tianjin University, 92 Weijin Road, Nankai District,  
11 Tianjin 300072, P.R. China.

12 4. Institute for Hepatology, National Clinical Research Center for Infectious Disease,  
13 Shenzhen Third People's Hospital, Shenzhen, P.R. China.

14 5. Department of Antibody, Y-clone Medical Science Co. Ltd. Suzhou, P.R. China.

15 6. Life Sciences Institute, Zhejiang University, Hangzhou, 310058 Zhejiang, P.R. China.

16 7. School of Life Sciences, Ningxia University, Yinchuan, P.R. China.

17 8. Jiangsu Key Laboratory of Molecular Medicine, Medical School, Nanjing University,  
18 Nanjing, P.R. China.

19 9. State Key Laboratory of Analytical Chemistry for Life Science, Nanjing University,  
20 Nanjing, P.R. China.

21 10. Lead contact

22 †These authors contributed equally to this work.

23 \*Corresponding author: Z. Wu, E-mail: [wzwh@nju.edu.cn](mailto:wzwh@nju.edu.cn) and S. Ye, E-mail:  
24 [sye@tju.edu.cn](mailto:sye@tju.edu.cn)

25 Mailing address: School of Life Sciences, Ningxia University, Yinchuan, 750021,  
26 China.

27 Phone: +86 (25) 8368-6092. Fax: +86 (25) 8359-6023.

28

29

30

31 **Abstract** (202 words)

32 Delta variant, also known as B.1.617.2, has become a predominant circulating variant  
33 in many countries since it first emerged in India in December 2020. Delta variant is less  
34 sensitive to serum neutralization from COVID-19 convalescent individuals or vaccine  
35 recipients, relative to Alpha strains. It was also resistant to neutralization by some anti-  
36 receptor binding domain (RBD) and anti-N-terminal domain (NTD) antibodies in  
37 clinics. Previously, we reported the discovery of nanobodies isolated from an alpaca  
38 immunized with spike protein, exhibiting ultrahigh potency against SARS-CoV-2 and  
39 its mutated variants, where a novel inhalable bispecific Nb15 protected SARS-CoV-2  
40 infection in hACE2 mice. Here, we found that Nb22-Fc, among our previously reported  
41 nanobodies, exhibited 8.4-fold increased neutralization potency against Delta variant  
42 with an IC<sub>50</sub> value of 0.41 ng/ml (5.13 pM) relative to Alpha variant. Furthermore, our  
43 crystal structural analysis reveals that the binding of Nb22 on SARS-CoV-2 RBD  
44 effectively blocks the binding of RBD to ACE2 during virus infection. Furthermore,  
45 the L452R mutation in RBD of Delta variant forms an additional hydrogen bond with  
46 the hydroxy group of T30 of Nb22, leading to the increased neutralization potency of  
47 Nb22 against Delta variant. Thus, Nb22 is a potential therapeutic agent against SARS-  
48 CoV-2, especially the highly contagious Delta variant.

49

50

51 **Keywords:** SARS-CoV-2, Delta variant, B.1.617.2, Nanobody, Nb22, RBD, Structure

52

53

54

55

56

57

58

59

60

61

62

63

64

65

66 **Introduction:**

67 SARS-CoV-2 has given rise to the COVID-19 pandemic [1], resulting in massive  
68 disruption of social and economic activities. Global vaccination has since provided  
69 protection against the catastrophic outcome of the pandemic. However, a new wave of  
70 infection, mainly caused by Delta variant, is spreading rapidly worldwide [2-5]. The  
71 Delta variant, also known as B.1.617.2, was first identified in Indian in December 2020,  
72 characterized by the spike protein mutations T19R, L452R, T478K, D614G, P681R,  
73 D950N and a double deletion 157-158 [6]. Delta variant has become predominant in  
74 many countries, representing over 90% of daily new cases in Africa, Asia, Europe,  
75 North America between August 01 and September 01, 2021  
76 (<https://www.gisaid.org/hcov19-variants/>). It has been designated as a Variant of  
77 Concern (VOC) and is believed to be 60% more transmissible than Alpha variant [7].

78  
79 Delta variant also poses a challenge to the COVID-19 vaccines. The protective  
80 effectiveness of AstraZeneca and Pfizer vaccines against Delta variant was reduced to  
81 60% and 88%, respectively [6, 7]. Neutralizing experiments indicated that AstraZeneca  
82 and Pfizer vaccine-elicited antibodies were less effective to Delta variant, with about  
83 3-5 fold less potent than that against Alpha variant [7]. To date, over 2 billion doses of  
84 vaccines have been administrated worldwide and several antibodies drug, like  
85 Casirivimab and Imdevimab combination, Bamlanivimab and Etesevimab combination,  
86 and Sotrovimab, were approved for emergency use in the prophylaxis or treatment of  
87 SARS-CoV-2 infection [8, 9]. Whereas, vaccine breakthrough infection was recently  
88 reported worldwide [10], which was mainly caused by Delta variant. Death caused by  
89 Delta variant was increasing with 2.05% weekly change since August 16, 2021  
90 (<https://covid19.who.int/>). Altogether, these findings highlight the urgent need to  
91 develop new anti-viral agents for the prophylaxis or treatment of the Delta variant  
92 infection.

93

94 Recent research indicated that the emerging Delta variant partially but significantly  
95 resists neutralization by mAbs, SARS-CoV-2 convalescent sera and vaccine-elicited

96 antibodies [11-13]. The K417N mutation in the spike protein could confer resistance to  
97 monoclonal antibodies Imdevimab and Casirivimab as well [7, 11, 14, 15]. Some mAbs,  
98 including Bamlanivimab, lost binding to the spike and failed to neutralize Delta variant  
99 [16]. B1-182.1 and A23-58.1, recently isolated from convalescent donors, exhibited  
100 ultrapotent neutralization against Delta variant with IC<sub>50</sub> values of 1.0 and 1.6 ng/ml,  
101 respectively [16].

102

103 To date, a growing number of nanobodies, single-domain fragments of camelid heavy-  
104 chain antibodies or VHH, were described for the prophylaxis or treatment of SARS-  
105 CoV-2 infection. However, rarely nanobodies with potent neutralization against Delta  
106 variant were reported [17-24]. Previously, we identified three ultrapotent nanobodies  
107 including Nb15-Fc, Nb22-Fc and Nb31-Fc against the initial strain of SARS-CoV-2,  
108 variant Wuhan-Hu-01 (WH01), with IC<sub>50</sub> values of ~1 ng/ml. These antibodies were  
109 isolated from an alpaca immunized with spike protein of WH01 variant. Nb15-Fc with  
110 the highest neutralization potency against WH01 variant was selected for further  
111 investigation. Of note, intranasal delivery of Nb15 could protect hACE2 mice infected  
112 by WH01 variant [25]. In the current report, we compared the neutralizing potency of  
113 the aforementioned nanobodies against various circulating SARS-CoV-2 variants. Like  
114 most anti-RBD antibodies, Nb15-Fc and Nb31-Fc exhibited reduced neutralization  
115 against Delta variant as compared to WH01 variant or Alpha variant. Surprisingly,  
116 Nb22-Fc exhibited increased neutralization potency against Delta variant comparing to  
117 against WH01 variant, to which the antibody was originally raised. It is uncommon that  
118 an anti-RBD antibody exhibited increased potency against Delta variant relative to  
119 Alpha variant. The binding characterization and crystal structural analysis were  
120 conducted to further explore the potential mechanism.

121

122 Overall, Nb22-Fc exhibits ultrapotent neutralization and warrants further development  
123 for the prophylaxis or treatment of SARS-CoV-2 circulating variants, especially the  
124 current predominant Delta variant. The structural analysis may further guide the  
125 rational design of pan-coronavirus vaccines and therapeutics.

## 126 **2. Materials and Methods**

### 127 **2.1. Expression, of nanobodies**

128 The Fc1 gene (CH2-CH3) of the human monoclonal antibody was fused with the VHH  
129 gene of nanobodies (named as Nb-Fc) to assist the purification and prolong the half-  
130 life of the Nb-Fc antibody, following our previously published protocol [26]. The Nb-  
131 Fcs were finally cloned into the pcDNA3.4 eukaryotic expression vector (Invitrogen),  
132 which were transfected into 293F cells (cat.# R79007, Thermo Scientific) to produce  
133 Nb-Fcs. Nb fused with Fc was purified using Protein G (cat.# 20399, Thermo  
134 Scientific).

135

### 136 **2.2 Neutralization activity of nanobodies against pseudovirus**

137 Pseudovirus neutralization assay was carried out following our previously published  
138 protocol [25], with the follow modifications. Briefly, pseudovirus of SARS-CoV-2  
139 variants was produced by co-transfection of pNL4-3.Luc.R-E-, an HIV-1 NL4-3  
140 luciferase reporter vector that comprises defective Nef, Env and Vpr (HIV AIDS  
141 Reagent Program), and pCDNA3.1 (Invitrogen) expression vectors encoding the spike  
142 proteins of respective variants into 293T cells (ATCC). Supernatants containing  
143 pseudovirus were collected after 48 hour (h), and viral titers were determined by  
144 luciferase assay in relative light units (Bright-Glo Luciferase Assay Vector System,  
145 Promega Biosciences). Human codon optimized S genes of SARS-CoV-2 variants were  
146 synthesized, and the corresponding pseudoviruses were produced following the above  
147 protocol. For neutralization assay, SNB02, an Nb-Fc specific against SFTSV [26],  
148 served as a negative control. Neutralization assays were conducted by incubating  
149 pseudovirus with serial dilutions of purified nanobodies at 37 °C for 1 h. HEK293T-  
150 ACE2 cells (cat.# 41107ES03, Yeasen Biotech Co., Ltd. China) (approximately  
151  $1.5 \times 10^4$  per well) were added in duplicate to the virus-antibody mixture. Half-maximal  
152 inhibitory concentrations (IC<sub>50</sub>) of the evaluated nanobodies were determined by  
153 luciferase activity 48 h following exposure to virus-antibody mixture, and analyzed by  
154 GraphPad Prism 8.01 (GraphPad Software Inc.).

155

### 156 **2.3 Immunofluorescence and flow cytometric analysis.**

157 Immunofluorescence and flow cytometric analysis were conducted following our  
158 previously published protocol [27], with minor modifications. Briefly, S gene  
159 sequences for SARS-CoV-2 spike protein of various SARS-CoV-2 variants were  
160 obtained from the GISAID website (<https://gisaid.org>). S genes were synthesized and  
161 constructed as expression plasmids by GenScript. The plasmids were transfected into  
162 293T cells (ATCC) cultured in 12-well plates. Next, 48 hours post transfection, the cells  
163 were washed by PBS and fixed with 4% paraformaldehyde for 20 minutes at room  
164 temperature. The purified Nb-Fc was used to stain the 293T cells, followed by Alexa  
165 Fluor 488 AffiniPure goat Anti-human IgG (H+L) (1:500 dilution) (109-545-003,  
166 Jackson ImmunoResearch). For immunofluorescence analysis, the cells on the plate  
167 were examined and the images were acquired using an OLYMPUS IX73. For flow  
168 cytometric analysis, the cells were resuspended in 500  $\mu$ l PBSF buffer (PBS+2% FBS)  
169 and analyzed using ACEA NovoCyte TM (Agilent Biosciences), non-transfected 293T  
170 cells served as a negative control.

171

### 172 **2.4 Affinity determination by Bio-Layer Interferometry (BLI)**

173 We measured antibody affinity using a ForteBio OctetRED 96 BLI (Molecular Devices  
174 ForteBio LLC, Fremont, CA) with shaking at 1,000 rpm at 25 °C [25]. To determine  
175 the affinity of nanobodies, RBD protein was coupled to AR2G biosensor (cat.# 18-5092,  
176 Fortebio) using BLI instrument following the instruction of the amino coupling kit.  
177 Association of Nb-Fcs in a serial dilution was carried out before dissociation for 180  
178 sec. After each cycle, the biosensors were regenerated through 3 brief pulses of 5 sec  
179 each with 100 mM pH 2.7 glycine-HCL followed by running buffer. The data were  
180 baseline subtracted before fitting using a 1:1 binding model and the ForteBio data  
181 analysis software.  $K_D$ ,  $K_a$  and  $K_d$  values were determined by applying a global fit to all  
182 data.

### 183 **2. 5. Expression and purification of RBD protein**

184 The SARS-CoV-2 RBD was expressed using the Bac-to-Bac baculovirus system,. The  
185 pAcgp67-RBD (residues 333–530) plasmid with a C-terminal 8×His tag was  
186 transfected into Sf9 cells using Cellfectin II Reagent (Invitrogen) to produce the  
187 recombinant baculoviruses. After 3 rounds of amplification, Hi5 cells were infected  
188 with baculoviruses at MOI of 4 at a density of  $2 \times 10^6$  cells/ml. The supernatants of cell  
189 culture containing the secreted RBD were harvested at 60 h after infection. The RBD  
190 was purified by Ni-NTA resin (GE Healthcare). Nonspecific contaminants were  
191 removed by washing the resin with 20 mM Tris-HCl, 150 mM NaCl, pH 7.5, and the  
192 target proteins were eluted with elution buffer containing 20 mM Tris-HCl, 150 mM  
193 NaCl, 500 mM imidazole, pH 7.5. The eluted proteins were further purified by  
194 Superdex 75 (GE Healthcare, USA) and stored in 20 mM Tris-HCl, 150 mM NaCl, pH  
195 7.5.

196

## 197 **2.6 Expression and purification of Nb22 for crystal structural analysis**

198 The VHH gene for Nb22 was amplified by PCR and cloned into a pET21a vector with  
199 *Bam*H I and *Xho* I restriction sites. The recombinant plasmids were transformed into  
200 *Escherichia coli*. BL21 (DE3). The cells were cultured in LB medium and grown to  
201  $OD_{600} = 0.8$  at 37°C. Isopropyl-D-1-thiogalactopyranoside (IPTG) was added to a final  
202 concentration of 1.0 mM to induce the protein expression, and the cultures were grown  
203 at 16 °C overnight. Cells were harvested by centrifugation at 4,500 rpm for 15 min, re-  
204 suspended and homogenized in the lysis buffer containing 20 mM Tris-HCl, 150 mM  
205 NaCl, pH 7.5 using ultrasonic. Cell debris were removed by centrifugation at 18,000  
206 rpm for 30 min. The supernatants were added to Ni- NTA resin (GE Healthcare, USA).  
207 The nonspecific contaminants were eluted by washing the resin with the lysis buffer  
208 containing 10 mM imidazole. The target protein with 6 x His tag, named as Nb22, were  
209 subsequently eluted with the lysis buffer containing 500 mM imidazole. Nb22 were  
210 eluted and purified by Superdex 75 (GE Healthcare, USA).

211

## 212 **2.7 Crystallization, structural determination and data acquisition**



213 The complexes were prepared by mixing SARS-CoV-2 RBD and Nb22 at a 1:1.2 molar  
214 ratio and incubating at 4 °C overnight. The complexes were further purified by  
215 Superdex 75 (GE Healthcare, USA) to remove the excess nanobody. The crystals were  
216 screened by vapor-diffusion sitting-drop method at 16°C. The crystals appeared and  
217 reached their final size within 3 days in a well solution comprising 0.1 M HEPES (pH  
218 7.0), 5% v/v (+/-)-2-Methyl-2,4-pentanediol (MPD) and 10% polyethylene glycol (PEG)  
219 10000.

220 To collect data, a single crystal was mounted on a nylon loop and was flash-cooled with  
221 a nitrogen gas stream at 100 K. Diffraction data was collected on BL18U1 at Shanghai  
222 Synchrotron Radiation Facility (SSRF) at a wavelength of 0.97915 Å with a Pilatus3  
223 6M image plate. Data were processed and scaled using the HKL3000 package [28]. The  
224 structure was elucidated using the molecular replacement (MR) method in PHASER  
225 program [29] with the structure of SARS-CoV-2 RBD (PDB code: 7CJF) [30] as the  
226 initial searching model. The model was built into the modified experimental electron  
227 density using COOT [31] and further refined in PHENIX [32]. The final refinement  
228 statistics were summarized in Table S1. Structural figures were prepared by PyMOL.  
229 Epitope and paratope residues, as well as their interactions, were identified by PISA  
230 ([http://www.ebi.ac.uk/pdbe/prot\\_int/pistart.html](http://www.ebi.ac.uk/pdbe/prot_int/pistart.html)) at the European Bioinformatics  
231 Institute.

232

## 233 **2.8. Quantification and statistical analysis**

234 All statistical analyses were carried out using GraphPad Prism 8.01 software (GraphPad)  
235 or OriginPro 8.5 software (OriginLab). ANOVA or Mann-Whitney test was performed  
236 for group comparisons.  $P < 0.05$  was considered as statistically significant with mean  
237  $\pm$ SEM or mean  $\pm$ SD.

238

## 239 **3. Results**

### 240 **3.1 Potent neutralization of Delta variant by nanobodies**

241 We previously reported the discovery and characterization of three potent neutralizing  
242 nanobodies against WH01 variant and the mutated variants with IC<sub>50</sub> values of ~1ng/ml.



243 These three nanobodies, Nb15-Fc, Nb22-Fc and Nb31-Fc, were identified binding to  
244 RBD [25]. Neutralization experiments were further conducted to measure their activity  
245 against the circulating variants including variants of concern (VOC) comprising Alpha  
246 (B.1.1.7 with N501Y), Beta (B.1.351 with E484K and N501Y), Delta (B.1.617.2 with  
247 L452R and T478K) and Gamma ( P.1 K417T, E484K and N501Y), as well as variants  
248 of interest (VOI) comprising Eta (B.1.525 with E484K), Iota (B.1.526 with E484K),  
249 Epsilon (B.1.429 with L452R), and Kappa (B.1.617.1 with L452R and E484Q) [2-5].  
250 Nb15-Fc exhibited increased potency against Alpha variant, but decreased potency  
251 against Delta variant or Epsilon as compared with WH01 variant, the variant RBD used  
252 to select the nanobodies. Nb31-Fc exhibited reduced potency against Alpha, Delta and  
253 Epsilon variants relative to WH01 or D614G variant. Nb15-Fc and Nb31-Fc failed to  
254 neutralize other variants containing E484K/Q mutation (Fig. 1A-F). Surprisingly,  
255 Nb22-Fc exhibited around 2.5-fold increased neutralizing potency against Delta variant  
256 with an IC<sub>50</sub> value of 0.41 ng/ml (5.13 pM) compared with variant WH01 with an IC<sub>50</sub>  
257 of 1.01 ng/ml (12.63 pM). Notably, Nb22-Fc also exhibited around 8.4-fold increased  
258 neutralization potency against Delta variant relative to variant Alpha with an IC<sub>50</sub> of  
259 3.45 ng/ml (43.13 pM) (Fig. 1A-F). All three nanobodies failed to neutralize variants  
260 containing E484K/Q mutation, suggesting that E484K/Q mutation in RBD could lead  
261 to the resistance to all three nanobodies.

262

263 Altogether, Nb15-Fc presented the most potent neutralization against variant Alpha  
264 with an IC<sub>50</sub> of 0.18 ng/ml, and Nb15-Fc and Nb31-Fc still retain potent neutralization  
265 of variants containing L452R and T478K mutations in RBD (Fig. 1E-F), though with  
266 reduced potency like most other anti-RBD antibodies [2, 7]. Of note, Nb22-Fc exhibited  
267 the most potent neutralization of variants Delta and Epsilon among three nanobodies  
268 (Fig. 1E-F).

269

### 270 **3.2 Characterization of Nb22-Fc binding to RBD**

271 To explore the characteristics of antibody binding to the RBD with respect to their  
272 neutralization of Delta variant, the interactions of three nanobodies with variant RBDs

273 were analyzed using biolayer interferometry (BLI). Nb15-Fc, Nb22-Fc and Nb31-Fc  
274 showed high affinity interactions with RBD of Delta variant at 1.86 nM, 0.31 nM and  
275 0.31 nM, respectively (Fig. 2A-D). However, the ultrahigh affinity of Nb22-Fc and  
276 Nb31-Fc to RBD of Delta variant did not reflect the neutralization potency accordingly  
277 as Nb22-Fc neutralized Delta variant with markedly more potency than that of Nb31-  
278 Fc, suggesting that affinity is not the only factor dictating the neutralization activity.  
279 Furthermore, Nb22-Fc exhibited increased affinity with Delta variant RBD relative to  
280 other variant RBDs (Fig. 2A-D), which is in line with the increased potency conferred  
281 by Nb22-Fc against Delta variant as compared with variant Alpha.

282

283 Moreover, immunofluorescence analysis revealed that Nb22-Fc interacted specifically  
284 with spike protein from WH01, D614G, Alpha, Epsilon and Delta variants on the  
285 surface of transfected 293T cells, whereas no binding with the spike protein from other  
286 variants containing E484K/Q mutation (Fig. 2E). These results were substantiated by  
287 FACS results (Fig. 2F). Overall, these specific binding characteristics are consistent  
288 with its specific neutralization properties.

289

### 290 **3.3 Structural analysis of RBD-Nb22 complex**

291 Structural analysis of Nb22 interaction with RBD was performed to address the  
292 increased neutralization potency of Delta variant. We determined the crystal structure  
293 of RBD-Nb22 complex at a resolution of 2.7 Å (Fig. 3A and Table S1). Nb22 adopts a  
294 typical  $\beta$ -barreled structure, and contains three variable complementarity-determining  
295 regions (CDR) binding to RBD. The buried surface area (BSA) was 800 Å<sup>2</sup>, and mainly  
296 constituted of hydrogen bonds and hydrophobic interactions. 14 residues constituting  
297 epitope of three CDRs were identified using a distance of <4 Å as the cutoff (Fig. 3B).  
298 For CDR1, T30 and S33 formed two hydrogen bonds with S494 of RBD, while the  
299 hydrophobic interactions included A32 and F34 of Nb22 and Y449, N450, L453, F490  
300 and Q493 of RBD (Fig. 3C). N57 of CDR2 interacted with G485, C488 by hydrogen  
301 bonds, and the hydrophobic interactions were mediated by I56, E484 and Y489 (Fig.  
302 3D). CDR3 was a relatively longer region with only one hydrogen bond (Y119 and

303 G446). The side chain of P104 inserted into the hydrophobic cavity formed by F101,  
304 R107, Y453 and F456 (Fig. 3E). Apart from the five hydrogen bonds in CDR regions,  
305 the interface of Nb22 and RBD was stabilized by three additional hydrogen bonds  
306 consisted of G1, S75, N450 and E484 (Fig. 3F). Interactions were also facilitated by  
307 the hydrophobic network constituted by P2, Q3, V4, G28, G29, R73 and D74 of Nb22  
308 (Fig. 3G).

309

### 310 **3.4 Nb22 blocks RBD binding to ACE2 and inhibits the Delta variant**

311 Superimposition of the structure of Nb22-RBD complex and that of RBD-ACE2 (PDB  
312 code: 6MOJ) immediately elucidates the structural basis of neutralization, in which the  
313 binding of Nb22 to RBD effectively blocks the binding of RBD to ACE2 during virus  
314 infection. First, the binding site of Nb22 on RBD is partly overlapped with that of ACE2  
315 (Fig. 4A). Second, the loop (V102-Y117) of Nb22 clashes with two  $\alpha$ -helices of the N-  
316 terminus of ACE2 (Fig. 4B).

317 The structure of Nb22-RBD complex also elucidates why Nb22 can block the infection  
318 of Delta variant with increased binding affinity. Delta variant contains two distinct  
319 mutations, T478K and L452R. To assess whether these two sites affected the interaction  
320 between Nb22 and RBD, we generated the hydrogen and hydrophobic network using  
321 PISA (Supplementary Table S2). The T478 is located outside the CDR binding regions  
322 (Fig. 5A), and does not disturb the hydrogen bonding and hydrophobic interactions.  
323 Therefore, T478K mutation has no effect on Nb22 neutralization (Fig. 5B and 5C).  
324 L452 is located at the edge of the epitope region of CDR1 and participates in the  
325 hydrophobic interactions of the interface. Mutation of L452 to arginine (R), though a  
326 hydrophobic to basic change, does not perturb the hydrophobic interaction. Instead, the  
327 guanidine moiety of R452 forms an additional hydrogen bond with the hydroxyl group  
328 of T30 of Nb22, thus enhancing the binding affinity (Fig. 5A and C).

329

### 330 **Discussion:**

331 A small number of nanobodies with ultrahigh potency against SARS-CoV-2 and its  
332 variants have been described [16, 33, 34], whereas majority of the nanobodies rarely

333 neutralize the currently circulating Delta variant. Our results revealed that three  
334 previously reported nanobodies [25], retained ultrahigh potency in neutralization  
335 against SARS-CoV-2 Delta variant. Among them, Nb22-Fc with an IC<sub>50</sub> value of  
336 0.41ng/ml (5.13 pM) is outstanding with increased neutralization of Delta variant  
337 compared with that of Alpha variant. The binding of Nb22 to RBD provides  
338 mechanistic insight into the enhanced neutralization against Delta variant, suggesting  
339 that the increased binding affinity enhanced the neutralizing potency against Delta  
340 variant relative to Alpha variant (Fig. 1). Given that most anti-RBD, anti-NTD  
341 antibodies or convalescent sera or vaccine-elicited antibodies showed reduced  
342 neutralization of Delta variant relative to that of Alpha variant [2, 7], the increased  
343 neutralization activity of Nb22-Fc against Delta variant is particularly striking and  
344 prompted us to explore the structural basis of the phenomenon.

345

346 The structural analysis further explored the Nb22-RBD binding characteristics and the  
347 mechanisms of viral inhibition. Nb22 binding to RBD effectively blocked the binding  
348 of RBD to ACE2 during virus infection. The binding site of Nb22 on RBD is partly  
349 overlapped with that of ACE2 (Fig. 4A), and the loop (V102-Y117) of Nb22 clashes  
350 with two  $\alpha$ -helices of the N-terminus of ACE2 (Fig. 4B). In addition, crystal structural  
351 analysis shows that T478K mutations of Delta variant are located outside 800 Å<sup>2</sup> buried  
352 surface area of Nb22 interacting with RBD and do not perturb the interaction between  
353 Nb22 and the RBD of Delta variant. Of note, the guanidine moiety in the L452R  
354 mutation forms an additional hydrogen bond with the hydroxyl group of T30 of Nb22,  
355 thus enhancing the binding affinity, suggesting the explanation of increased binding and  
356 neutralizing potency of Nb22 against Delta variant characterized with L452R and  
357 T478K mutations in RBD. Moreover, the BSA of Nb22-RBD (800 Å<sup>2</sup>) is relatively  
358 large compared to reported neutralizing nanobodies (Table S3). When RBD mutates to  
359 L452R and T478K, the BSA extends from 800 Å<sup>2</sup> to 830 Å<sup>2</sup>, which contributes to the  
360 higher binding.

361

362 Previously, we reported a bi-specific trimer configuration Nb<sub>15</sub>-Nb<sub>H</sub>-Nb<sub>15</sub> based on

363 Nb15 nanobodies, which contains Nb15 specific for RBD and NbH specific for human  
364 serum albumin protein in blood [25]. Nb<sub>15</sub>-Nb<sub>H</sub>-Nb<sub>15</sub> exhibited increased neutralization  
365 *in vitro* and half-life *in vivo*. Importantly, intranasal delivery of Nb<sub>15</sub>-Nb<sub>H</sub>-Nb<sub>15</sub> resulted  
366 in the prevention and therapy of SARS-CoV-2 infection in hACE2 mice [25]. As such,  
367 we presume that Nb22 could also be engineered as Nb<sub>22</sub>-Nb<sub>H</sub>-Nb<sub>22</sub> like Nb15 with both  
368 improved *in vivo* stability and neutralization. Accordingly, given ultrapotent  
369 neutralization of Nb22 against Delta variant with an IC<sub>50</sub> value of 0.41 ng/ml, intranasal  
370 delivery of Nb<sub>22</sub>-Nb<sub>H</sub>-Nb<sub>22</sub> could achieve similar therapeutic efficacy as Nb<sub>15</sub>-Nb<sub>H</sub>-  
371 Nb<sub>15</sub> against Delta variant infection *in vivo*.

372

373 In summary, SARS-CoV-2 Delta variant is characterized by the substitutions of T478K  
374 and L452R in RBD, which are known to affect transmissibility of the virus as well as  
375 neutralization by antibodies [35]. Whereas unlike Nb15-Fc and Nb31-Fc, Nb22-Fc  
376 exhibited increased neutralization potency against Delta variant relative to other  
377 variants. Structural analysis provides a mechanistic explanation to the sensitivity of  
378 Delta variant to and the increased neutralization potency of this antibody. T478K  
379 mutation was located outside the buried surface area without impacting the interaction  
380 of Nb22 with RBD of Delta variant, while an additional hydrogen bond, formed by  
381 L452R of RBD with T30 of Nb22, possibly contributing to the increased neutralization  
382 potency of Nb22 against Delta variant. To the best of our knowledge, Nb22-Fc  
383 exhibited one of the highest neutralization potencies among the reported antibodies or  
384 nanobodies against Delta variant infection [2, 7, 14, 33, 36]. In view of the global  
385 dissemination of the Delta variant, Nb22 will be a potential candidate for the  
386 prophylaxis or treatment of the prevalent Delta variant or other circulating variants  
387 infection.

### 388 **Acknowledgements**

389 We thank Prof. Guo. for providing the plasmid of RBD. The X-ray data was collected  
390 using Shanghai Synchrotron Radiation Facility on beamline 18U1. This work was  
391 supported by National Science Foundation of China (NSFC) (No. 81803414 to X.W.,

392 31970149 to Z.W.), the Major Research and Development Project (2018ZX10301406  
393 to Z.W.), Ministry of Science and Technology (2020YFA0908500 to S.Y.), the National  
394 Natural Science Foundation of China (31971127 to S.Y. and 81801998 to Y.W.), Tianjin  
395 Natural Science Foundation (20JCQNJC01570 to Y.W.), Nanjing University-Ningxia  
396 University Collaborative Project (Grant# 2017BN04 to Z.W.), Jiangsu Province Natural  
397 Science Foundation for Young Scholar (Grant# BK20170653 to X.W.), Key Natural  
398 Science Foundation of Jiangsu Province (Grant# ZDA2020014 to X.W.), Jiangsu  
399 province “Innovative and Entrepreneurial talent” and Six Talent Peaks Project of  
400 Jiangsu Province, the Emergency Prevention and Control Capacity Program for New  
401 Severe Infectious diseases of National Institute for Viral Disease Control and  
402 Prevention, and the 135 Strategic Program of Chinese Academy of Sciences, the  
403 Science and Technology Innovation Committee of Shenzhen Municipality  
404 (JCYJ20180228162229889 to L.C.).

405

#### 406 **Author contributions**

407 XW conducted most experiments, analyzed the data and wrote the draft manuscript. LC  
408 conducted all the neutralization experiments. LZ, BH, SX, HS, DZ, LL, WN provided  
409 technical assistance. YW and SY conducted structural analysis. ZW designed the study,  
410 directed and revised the manuscript. All authors critically reviewed the draft manuscript  
411 and approved the final version.

412

413 **Declaration of interests:** The authors declared no competing interests.

414

415

416

417

418

419

420

421

422



## 423 **Figure Legends**

424 **Figure 1 Characterizing nanobodies neutralizing circulating variants of SARS-**  
425 **CoV-2.** The neutralization curve of Nb15-Fc (A), Nb22-Fc (B), Nb31-Fc(C) and  
426 SNB02 (D) inhibiting SARS-CoV-2 pseudovirus of circulating variants. Nb-Fcs and  
427 SNB02 were all constructed as the format of VHH fused with human Fc1. SNB02 was  
428 taken as an antibody control specific for SFTS virus. (E) The summary curve of IC<sub>50</sub>  
429 of Nb-Fcs exhibiting potent neutralization against SARS-CoV-2 variants. (F) The  
430 summary table of IC<sub>50</sub> and IC<sub>80</sub> of Nb-Fcs in A-C, displaying potent neutralization. Data  
431 are represented as mean ± SD. All experiments were repeated at least twice.

432  
433 **Figure 2. Characterizing the binding of Nbs.** Kinetic binding curve of Nb15-Fc (A),  
434 Nb22-Fc (B) and Nb31-Fc (C) at the concentration 33.3 nM, 11.1nM, 3.7nM and 1.2  
435 nM with RBD of Delta variant, respectively, detected by BLI. Binding curves are  
436 colored black, and fit of the data to a 1:1 binding model is colored red. (D)  
437 Representative binding curve of various RBD as indicated to Nb22-Fc tested by BLI.  
438 Nb22-Fc binding with RBD from representative SARS-CoV-2 variants detected by  
439 immunofluorescence assay (E) and FACS (F), respectively. Mock served as a cell  
440 control without plasmid transfection. Images were visualized under the ×10 objective.  
441 All experiments were repeated at least twice.

442  
443 **Figure 3. Structural analysis of Nb22 and SARS-CoV-2 RBD complex.** (A) The  
444 overall complex structure of Nb22 and RBD. The CDR1 (red), CDR2 (blue), CDR3  
445 (green) of Nb22 (pink) and RBD (orange) were displayed in cartoon representation. (B)  
446 The epitope of Nb22 shown in surface representation. The CDR regions were colored  
447 in red, blue and green, respectively. The interaction between CDR1 (C), CDR2 (D),  
448 CDR3 (E) and RBD. (F) The hydrogen bonds of the interface between Nb22 and RBD.  
449 The hydrogen bonds were shown in cyan dash line. (G) The hydrophobic network  
450 between Nb22 and RBD. All the residues were shown in sticks.

451  
452 **Figure 4. Nb22 blocked the binding of ACE2 to RBD.** (A) Overlap of Nb22 and  
453 ACE2 binding sites on RBD. ACE2 binding site on RBD was shown in cyan line, Nb22  
454 binding site was shown in pink line. The overlap region was represented by ellipses  
455 with dashed lines. (B) The loop (V102-Y117) of Nb22 was clashed with the two helices  
456 on N-terminal of ACE2. The loop was colored in red and helices were colored in green.

457  
458 **Figure 5. Nb22 potentially resisted the Delta variant (B.1.617.2).** (A) The two  
459 mutation sites of B.1.617.2 in RBD. T478 was located outside the CDR binding regions,  
460 L452 was on the CDR2 recognized epitope. L452 and T478 was colored in cyan,  
461 epitope of CDRs was colored identical to Fig 1. (B) and (C) Comparison of hydrogen  
462 bonds of L452R and T478K mutations. T478K did not affect hydrogen bonds on the  
463 interaction interface of Nb22 and RBD. (C) L452R formed an additional hydrogen bond  
464 with T30 of Nb22. had relatively little influence on hydrophobic network. The residues



465 identified were shown in sticks.

466

467

## 468 **Supplemental Materials**

469 **Supplemental Table 1.** Data collection and refinement statistics

470 **Supplemental Table 2.** Hydrogen bonds of the interface between WT or B1.617.2  
471 RBD with Nb22.

472 **Supplemental Table 3.** BSA Comparison with reported neutralizing nanobodies.

473

474

475

476

477

478

479

480

481

482

483

484

485

486

487

488

489

490

491

492

493

494

495

496 **Figures**

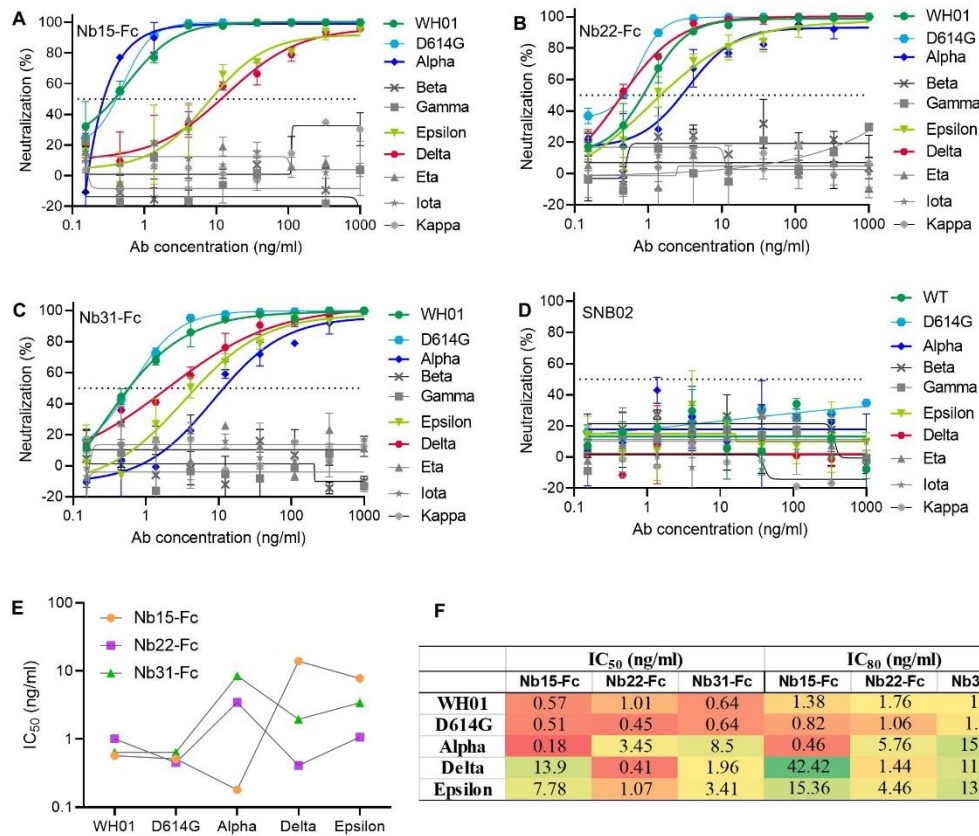

497

498 **Figure 1 Characterizing nanobodies neutralizing circulating variants of SARS-**  
 499 **CoV-2.** The neutralization curve of Nb15-Fc (A), Nb22-Fc (B), Nb31-Fc(C) and  
 500 SNB02 (D) inhibiting SARS-CoV-2 pseudovirus of circulating variants. Nb-Fcs and  
 501 SNB02 were all constructed as the format of VHH fused with human Fc1. SNB02 was  
 502 taken as an antibody control specific for SFTS virus. (E) The summary curve of  $IC_{50}$   
 503 of Nb-Fcs exhibiting potent neutralization against SARS-CoV-2 variants. (F) The  
 504 summary table of  $IC_{50}$  and  $IC_{80}$  of Nb-Fcs in A-C, displaying potent neutralization. Data  
 505 are represented as mean  $\pm$  SD. All experiments were repeated at least twice.

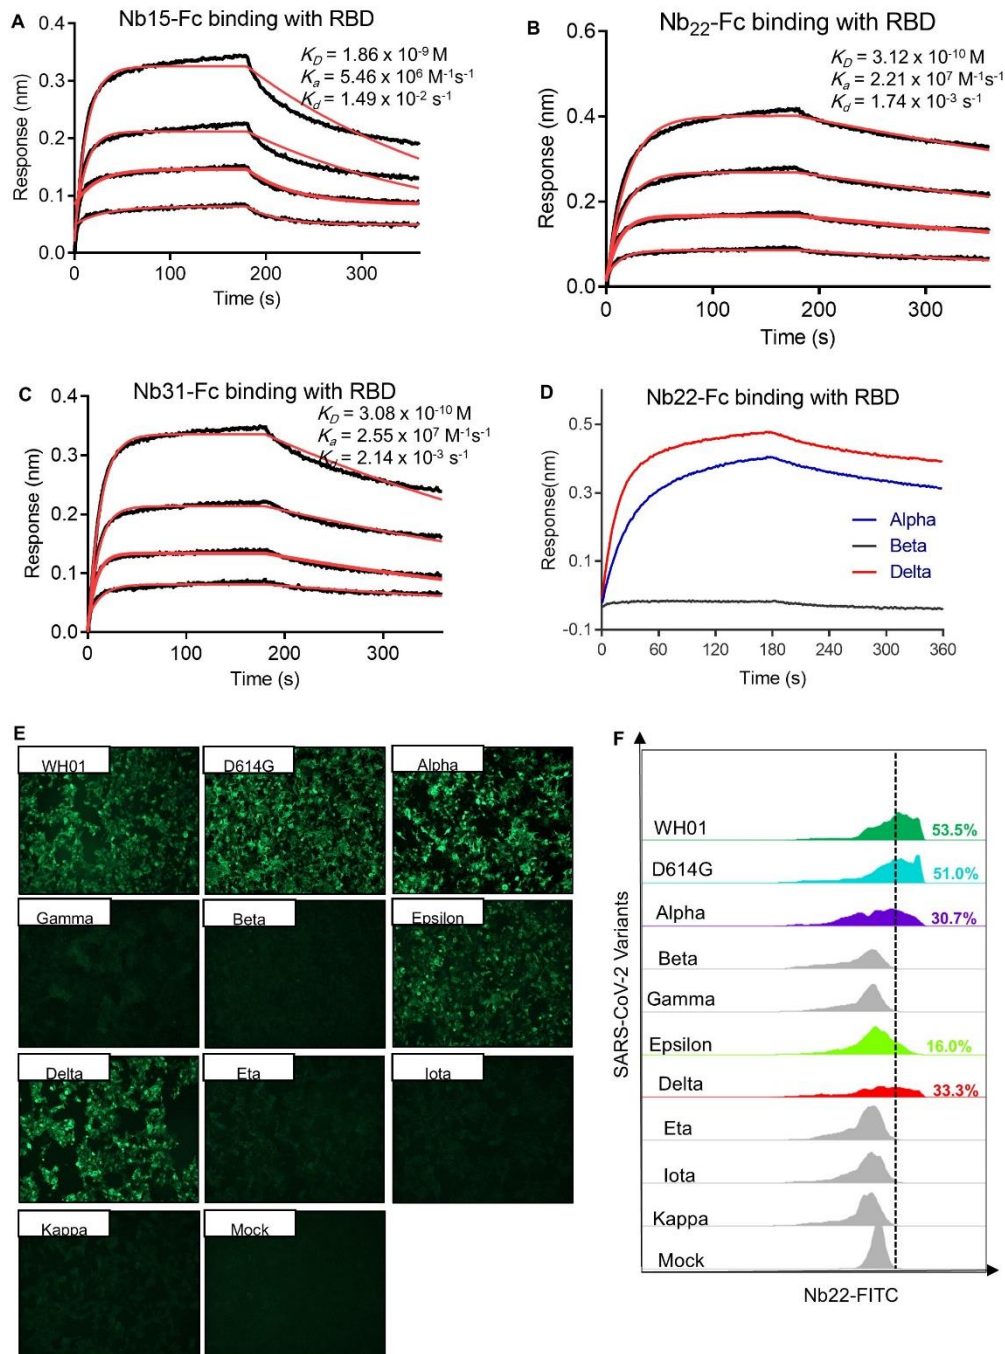

506

507 **Figure 2. Characterizing the binding of Nbs.** Kinetic binding curve of Nb15-Fc (A),  
 508 Nb22-Fc (B) and Nb31-Fc (C) at the concentration 33.3 nM, 11.1nM, 3.7nM and 1.2  
 509 nM with RBD of Delta variant, respectively, detected by BLI. Binding curves are  
 510 colored black, and fit of the data to a 1:1 binding model is colored red. (D)  
 511 Representative binding curve of various RBD as indicated to Nb22-Fc tested by BLI.  
 512 Nb22-Fc binding with RBD from representative SARS-CoV-2 variants detected by  
 513 immunofluorescence assay (E) and FACS (F), respectively. Mock served as a cell

514 control without plasmid transfection. Images were visualized under the  $\times 10$  objective.

515 All experiments were repeated at least twice.

516

517

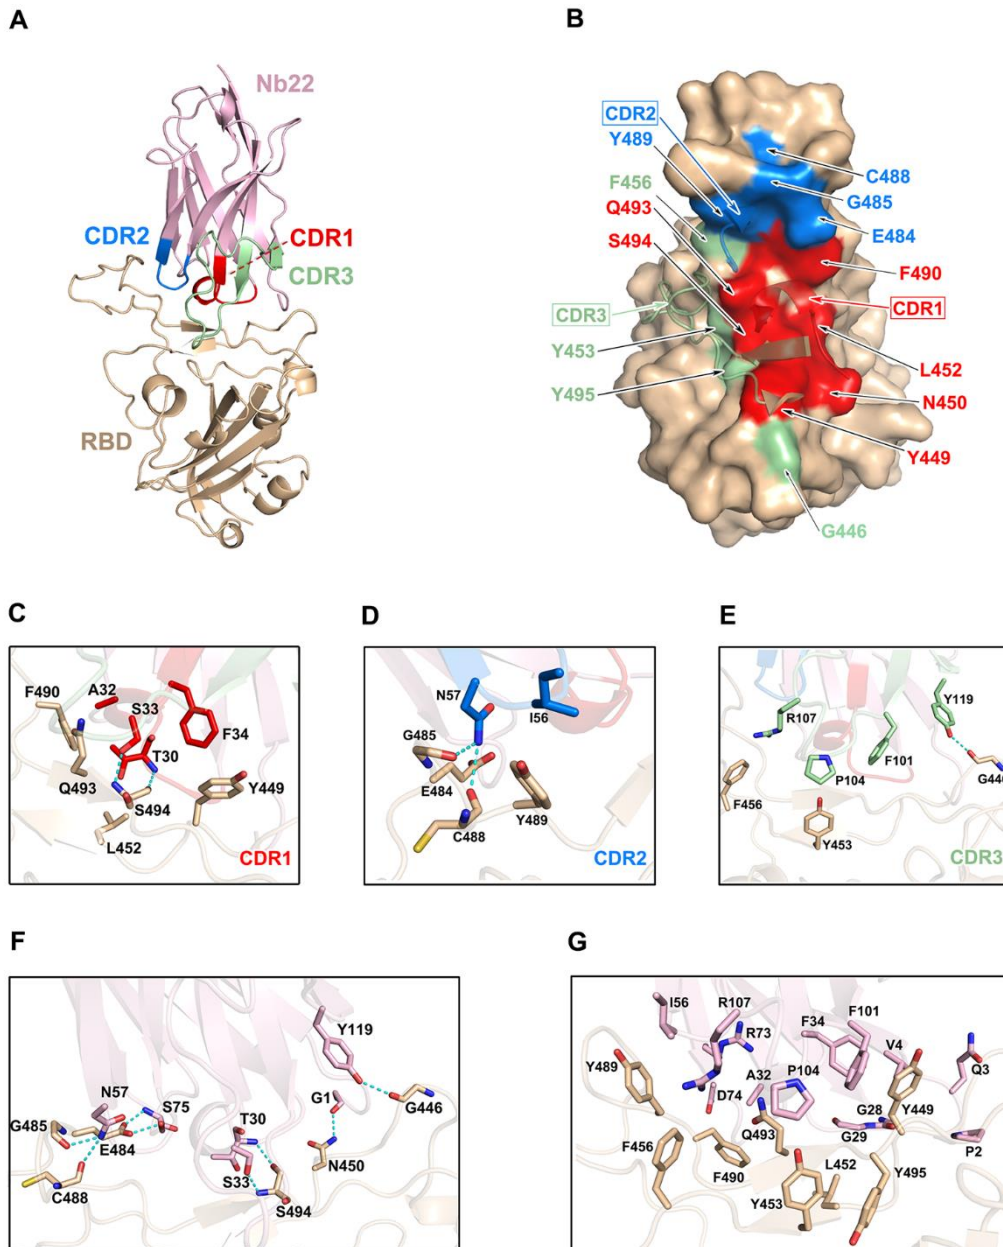

518

519 **Figure 3. Structural analysis of Nb22 and SARS-CoV-2 RBD complex.** (A) The

520 overall complex structure of Nb22 and RBD. The CDR1 (red), CDR2 (blue), CDR3

521 (green) of Nb22 (pink) and RBD (orange) were displayed in cartoon representation. (B)

522 The epitope of Nb22 shown in surface representation. The CDR regions were colored



523 in red, blue and green, respectively. The interaction between CDR1 (C), CDR2 (D),  
524 CDR3 (E) and RBD. (F) The hydrogen bonds of the interface between Nb22 and RBD.  
525 The hydrogen bonds were shown in cyan dash line. (G) The hydrophobic network  
526 between Nb22 and RBD. All the residues were shown in sticks.

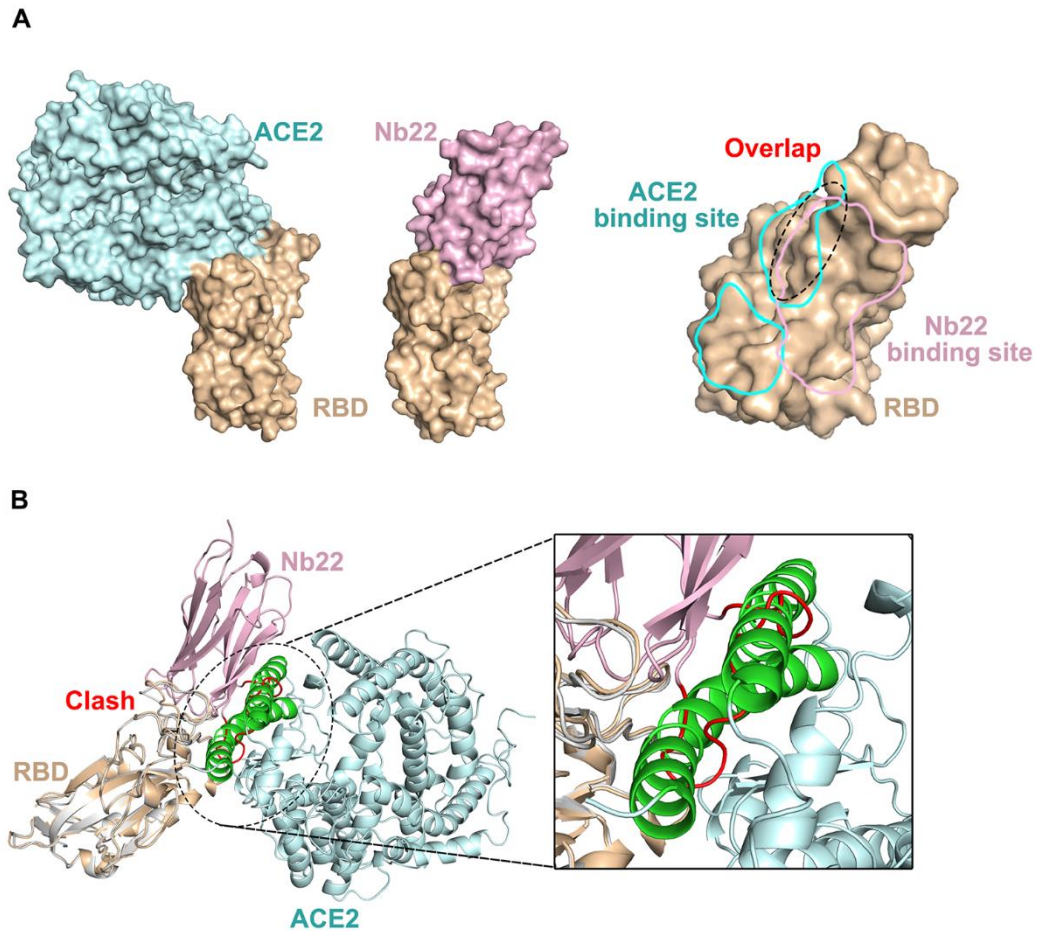

527  
528 **Figure 4. Nb22 blocked the binding of ACE2 to RBD.** (A) Overlap of Nb22 and  
529 ACE2 binding sites on RBD. ACE2 binding site on RBD was shown in cyan line, Nb22  
530 binding site was shown in pink line. The overlap region was represented by ellipses  
531 with dashed lines. (B) The loop (V102-Y117) of Nb22 was clashed with the two helices  
532 on N-terminal of ACE2. The loop was colored in red and helices were colored in green.

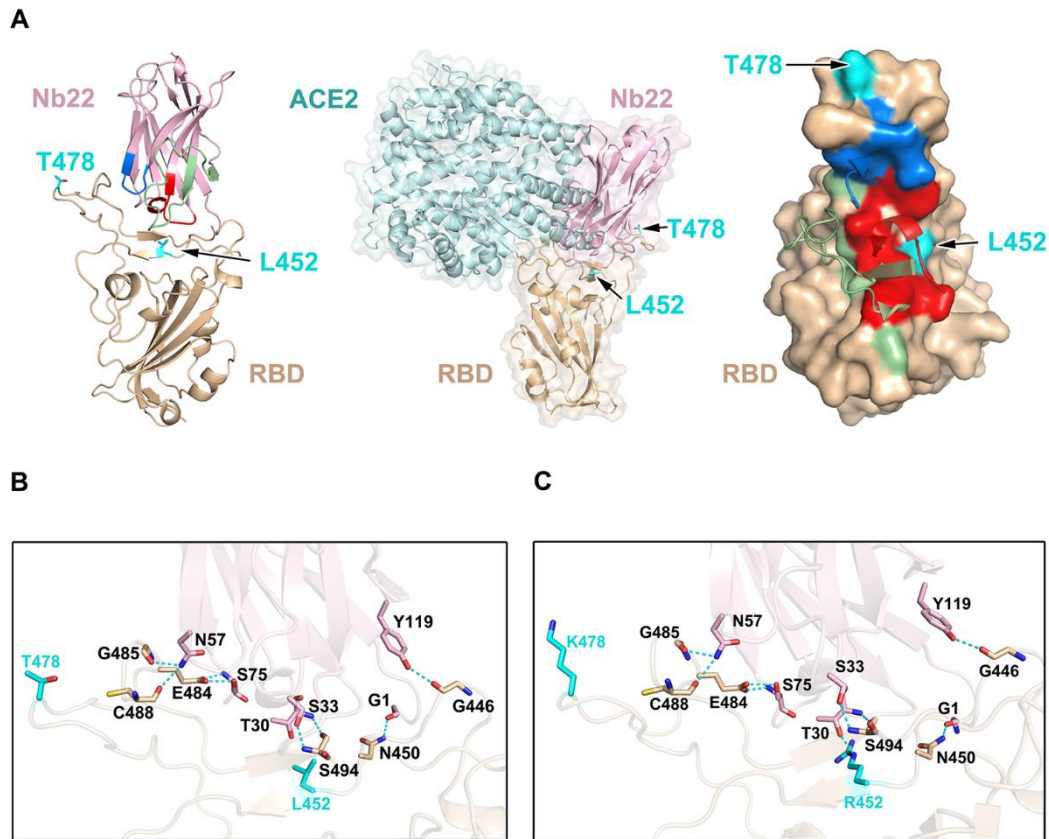

533

534 **Figure 5. Nb22 potentially resisted the Delta variant (B.1.617.2).** (A) The two  
535 mutation sites of B.1.617.2 in RBD. T478 was located outside the CDR binding regions,  
536 L452 was on the CDR2 recognized epitope. L452 and T478 was colored in cyan,  
537 epitope of CDRs was colored identical to Fig 1. (B) and (C) Comparison of hydrogen  
538 bonds of L452R and T478K mutations. T478K did not affect hydrogen bonds on the  
539 interaction interface of Nb22 and RBD. (C) L452R formed an additional hydrogen bond  
540 with T30 of Nb22. had relatively little influence on hydrophobic network. The residues  
541 identified were shown in sticks.

542

543

#### 544 Reference

- 545 1. Zhou, P., et al., *A pneumonia outbreak associated with a new coronavirus of probable bat origin.*  
546 *Nature*, 2020.
- 547 2. Liu, C., et al., *Reduced neutralization of SARS-CoV-2 B.1.617 by vaccine and convalescent*  
548 *serum.* *Cell*, 2021.
- 549 3. Garcia-Beltran, W.F., et al., *Multiple SARS-CoV-2 variants escape neutralization by vaccine-*  
550 *induced humoral immunity.* *Cell*, 2021.

- 551 4. Davies, N.G., et al., *Increased mortality in community-tested cases of SARS-CoV-2 lineage*  
552 *B.1.1.7*. Nature, 2021.
- 553 5. Plante, J.A., et al., *The variant gambit: COVID-19's next move*. Cell Host & Microbe, 2021.  
554 **29**(4): p. 508-515.
- 555 6. Bernal, J.L., et al., *Effectiveness of Covid-19 Vaccines against the B.1.617.2 (Delta) Variant*.  
556 New England Journal of Medicine, 2021.
- 557 7. Planas, D., et al., *Reduced sensitivity of SARS-CoV-2 variant Delta to antibody neutralization*.  
558 Nature, 2021.
- 559 8. Baum, A., et al., *REGN-COV2 antibodies prevent and treat SARS-CoV-2 infection in rhesus*  
560 *macaques and hamsters*. Science (New York, N.Y.), 2020. **370**(6520): p. 1110-1115.
- 561 9. Chen, P., et al., *SARS-CoV-2 Neutralizing Antibody LY-CoV555 in Outpatients with Covid-19*.  
562 New England Journal of Medicine, 2020.
- 563 10. Farinholt, T., et al., *Transmission event of SARS-CoV-2 Delta variant reveals multiple vaccine*  
564 *breakthrough infections*. medRxiv : the preprint server for health sciences, 2021.
- 565 11. Wall, E.C., et al., *Neutralising antibody activity against SARS-CoV-2 VOCs B.1.617.2 and*  
566 *B.1.351 by BNT162b2 vaccination*. Lancet, 2021. **397**(10292): p. 2331-2333.
- 567 12. Wall, E.C., et al., *AZD1222-induced neutralising antibody activity against SARS-CoV-2 Delta*  
568 *VOC*. Lancet, 2021. **398**(10296): p. 207-209.
- 569 13. Yadav, P.D., et al., *Neutralization of variant under investigation B.1.617 with sera of BBV152*  
570 *vaccinees*. Clinical infectious diseases : an official publication of the Infectious Diseases Society  
571 of America, 2021.
- 572 14. Taylor, P.C., et al., *Neutralizing monoclonal antibodies for treatment of COVID-19*. Nature  
573 Reviews Immunology, 2021. **21**(6): p. 382-393.
- 574 15. Starr, T.N., et al., *Complete map of SARS-CoV-2 RBD mutations that escape the monoclonal*  
575 *antibody LY-CoV555 and its cocktail with LY-CoV016*. Cell Reports Medicine, 2021. **2**(4).
- 576 16. Wang, L., et al., *Ultrapotent antibodies against diverse and highly transmissible SARS-CoV-2*  
577 *variants*. Science (New York, N.Y.), 2021. **373**(6556).
- 578 17. Xiang, Y., et al., *Versatile and multivalent nanobodies efficiently neutralize SARS-CoV-2*.  
579 Science (New York, N.Y.), 2020. **370**(6523): p. 1479-1484.
- 580 18. Schoof, M., et al., *An ultrapotent synthetic nanobody neutralizes SARS-CoV-2 by stabilizing*  
581 *inactive Spike*. Science (New York, N.Y.), 2020. **370**(6523): p. 1473-1479.
- 582 19. Huo, J.D., et al., *Neutralizing nanobodies bind SARS-CoV-2 spike RBD and block interaction*  
583 *with ACE2*. Nature Structural & Molecular Biology, 2020. **27**(9): p. 846-+.
- 584 20. Hanke, L., et al., *An alpaca nanobody neutralizes SARS-CoV-2 by blocking receptor interaction*.  
585 Nature Communications, 2020. **11**(1).
- 586 21. Wu, Y., et al., *Identification of Human Single-Domain Antibodies against SARS-CoV-2*. Cell  
587 Host & Microbe, 2020. **27**(6): p. 891-+.
- 588 22. Dong, J., et al., *Development of multi-specific humanized llama antibodies blocking SARS-CoV-*  
589 *2/ACE2 interaction with high affinity and avidity*. Emerging Microbes & Infections, 2020. **9**(1):  
590 p. 1034-1036.
- 591 23. Nambulli, S., et al., *Inhalable Nanobody (PiN-21) prevents and treats SARS-CoV-2 infections*  
592 *in Syrian hamsters at ultra-low doses*. Science Advances, 2021. **7**(22).
- 593 24. Pymm, P., et al., *Nanobody cocktails potently neutralize SARS-CoV-2 D614G N501Y variant*  
594 *and protect mice*. Proc Natl Acad Sci U S A, 2021. **118**(19).



- 595 25. Wu, X., et al., *A potent bispecific nanobody protects hACE2 mice against SARS-CoV-2 infection*  
596 *via intranasal administration*. bioRxiv, 2021: p. 2021.02.08.429275.
- 597 26. Wu, X., et al., *A single-domain antibody inhibits SFTSV and mitigates virus-induced*  
598 *pathogenesis in vivo*. JCI Insight, 2020. **5**(13).
- 599 27. Huang, B., et al., *Potent Neutralizing Humanized Antibody With Topical Therapeutic Potential*  
600 *Against HPV18-Related Cervical Cancer*. Frontiers in Immunology, 2021. **12**(2339).
- 601 28. Minor, W., et al., *HKL-3000: the integration of data reduction and structure solution--from*  
602 *diffraction images to an initial model in minutes*. Acta Crystallogr D Biol Crystallogr, 2006.  
603 **62**(Pt 8): p. 859-66.
- 604 29. McCoy, A.J., et al., *Phaser crystallographic software*. J Appl Crystallogr, 2007. **40**(Pt 4): p.  
605 658-674.
- 606 30. Jin, Z., et al., *Structure of M(pro) from SARS-CoV-2 and discovery of its inhibitors*. Nature, 2020.  
607 **582**(7811): p. 289-293.
- 608 31. Emsley, P., et al., *Features and development of Coot*. Acta Crystallogr D Biol Crystallogr, 2010.  
609 **66**(Pt 4): p. 486-501.
- 610 32. Adams, P.D., et al., *PHENIX: a comprehensive Python-based system for macromolecular*  
611 *structure solution*. Acta Crystallogr D Biol Crystallogr, 2010. **66**(Pt 2): p. 213-21.
- 612 33. Guttler, T., et al., *Neutralization of SARS-CoV-2 by highly potent, hyperthermostable, and*  
613 *mutation-tolerant nanobodies*. Embo Journal.
- 614 34. Wrapp, D., et al., *Structural Basis for Potent Neutralization of Betacoronaviruses by Single-*  
615 *Domain Camelid Antibodies*. Cell, 2020. **181**(6): p. 1436-1441.
- 616 35. Starr, T.N., et al., *Complete map of SARS-CoV-2 RBD mutations that escape the monoclonal*  
617 *antibody LY-CoV555 and its cocktail with LY-CoV016*. Cell Rep Med, 2021. **2**(4): p. 100255.
- 618 36. Koenig, P.A., et al., *Structure-guided multivalent nanobodies block SARS-CoV-2 infection and*  
619 *suppress mutational escape*. Science, 2021. **371**(6530): p. 691-+.
- 620
- 621
